# Visualization of Painful Experiences Believed to Trigger the Activation of Affective and Emotional Brain Regions in Subjects with Low Back Pain

Kazuhiro Shimo<sup>1</sup>, Takefumi Ueno<sup>2</sup>, Jarred Younger<sup>3</sup>, Makoto Nishihara<sup>1</sup>, Shinsuke Inoue<sup>1</sup>, Tatsunori Ikemoto<sup>4</sup>, Shinichirou Taniguchi<sup>5</sup>, Takahiro Ushida<sup>1,5\*</sup>

**1** Multidisciplinary Pain Center, Aichi Medical University, Aichi, Japan, **2** Department of Neuropsychiatry, Kyushu University, Fukuoka, Japan, **3** Department of Anesthesia, School of Medicine, Stanford University, Stanford, California, United States of America, **4** NPO Pain Medicine Research Information Center, Kochi, Japan, **5** Department of Orthopaedic Surgery, Kochi Medical School, Kochi, Japan

## Abstract

In the management of clinical low back pain (LBP), actual damage to lower back areas such as muscles, intervertebral discs etc. are normally targeted for therapy. However, LBP may involve not only sensory pain, but also underlying affective pain which may also play an important role overall in painful events. Therefore we hypothesized that visualization of a painful event may trigger painful memories, thus provoking the affective dimension of pain. The present study investigated neural correlates of affect processing in subjects with LBP ( $n = 11$ ) and subjects without LBP ( $n = 11$ ) through the use of virtual LBP stimuli. Whole brain functional magnetic resonance imaging (fMRI) was performed for all subjects while they were shown a picture of a man carrying luggage in a half-crouching position. All subjects with LBP reported experiencing discomfort and 7 LBP subjects reported experiencing pain. In contrast to subjects without LBP, subjects with LBP displayed activation of the cortical area related to pain and emotions: the insula, supplementary motor area, premotor area, thalamus, pulvinar, posterior cingulate cortex, hippocampus, fusiform gyrus, and cerebellum. These results suggest that the virtual LBP stimuli caused memory retrieval of unpleasant experiences and therefore may be associated with prolonged chronic LBP conditions.

**Citation:** Shimo K, Ueno T, Younger J, Nishihara M, Inoue S, et al. (2011) Visualization of Painful Experiences Believed to Trigger the Activation of Affective and Emotional Brain Regions in Subjects with Low Back Pain. PLoS ONE 6(11): e26681. doi:10.1371/journal.pone.0026681

**Editor:** Kazutaka Ikeda, Tokyo Metropolitan Institute of Medical Science, Japan

**Received:** July 1, 2011; **Accepted:** October 2, 2011; **Published:** November 2, 2011

**Copyright:** © 2011 Shimo et al. This is an open-access article distributed under the terms of the Creative Commons Attribution License, which permits unrestricted use, distribution, and reproduction in any medium, provided the original author and source are credited.

**Funding:** This work was supported by a Grant-in-Aid for Scientific Research from the Ministry of Health, Labour, and Welfare. The funders had no role in study design, data collection and analysis, decision to publish, or preparation of the manuscript.

**Competing Interests:** The authors have declared that no competing interests exist.

\* E-mail: ushidat-koc@umin.ac.jp

## Introduction

Psychological factors are known to affect the subjective experience of pain. Pain catastrophizing is one such maladaptive response to pain that is characterized by heightened pain intensity [1], increased disability [2] and difficulty disengaging from pain [3]. Recently, functional neuroimaging techniques have been developed that allow the neural correlates of psychological states to be explored. The blood oxygenation level-dependent contrast (BOLD-fMRI) is currently the most popular tool for mapping human brain activity [4]. Pain-related brain activations which could be considered as psychological factors have been reported in various studies. In healthy volunteers, several brain regions, including the primary and secondary somatosensory cortices, insula, anterior cingulate cortex (ACC), thalamus, and motor cortex, respond to real noxious stimuli and are regarded as part of the “pain matrix” [5,6]. However, it is also known that the expectation of pain can evoke brain activation patterns resembling that of a real pain experience [7].

In a previous study [8,9], Ogino reported that the imagination of pain even without physical injury engages the cortical representations of the pain-related neural network. Also, we

reported that prior pain experiences can strongly affect pain anticipation and associated brain activations. We have also found that the anticipation of painful stimuli can cause the activation of cortical areas underlying pain-related affect in chronic neuropathic pain patients [10]. Activation in the brain during the visualization of a painful experience was found in the ACC and the medial prefrontal cortex (MPFC), which are regions known to be areas associated with pain and affect processing. Similar activations were found to be correlated with pain catastrophizing in individuals with fibromyalgia [11]. In that study, pain catastrophizing was associated with greater activity in the dorsolateral prefrontal cortex, rostral ACC, and MPFC, regions implicated in pain vigilance, attention and awareness [12,13,14,15]. These results suggest that pain-related neuronal activities might reflect the development and maintenance of chronic pain syndromes.

Low back pain (LBP) is one of the most common chronic pain syndromes. A recent fMRI study in humans reported actual LBP-related cerebral substrates [16]. Abnormal activations were identified in the prefrontal cortex, insula, thalamus, posterior cingulate cortex (PCC), supplementary motor area (SMA), and premotor areas (PMA) – predominantly in the right hemisphere.

**Table 1.** Evaluations of task-related discomfort and pain.

|                             | LBP group (n = 11) | non-LBP group (n = 11) |
|-----------------------------|--------------------|------------------------|
| Experiences evoked by tasks |                    |                        |
| Discomfort (range)          | 3.5 (1–6)          | 0                      |
| Pain (range)                | 2.1 (0–6)          | 0                      |
| RDQ (mean $\pm$ SD)         | 3.1 $\pm$ 3.1      | 0                      |
| ODI (mean $\pm$ SD)         | 19.8 $\pm$ 7.8%    | 0                      |

RDQ, Roland-Morris Disability Questionnaire; ODI, Oswestry Disability Index 2.0.  
doi:10.1371/journal.pone.0026681.t001

We hypothesized that visualization of a painful experience would provoke unpleasant emotions, and these emotions might have a role in the maintenance of chronic pain syndromes. The present study investigated neural correlates of affect processing in subjects with nonspecific LBP and subjects without LBP by using virtual visual stimuli.

## Results

### Self-reported discomfort and pain (Table 1)

All subjects in the LBP group reported discomfort associated with viewing the simulated back pain (mean NRS score, 3.5; range, 1–6). 7 of the 11 subjects in the LBP group described pain associated with the task. However, no subjects in the non-LBP group reported any discomfort or pain resulting from viewing the picture of back pain.

### fMRI results

Compared with the non-LBP group, the LBP group demonstrated significantly more activation in the left fusiform, as well as left inferior temporal gyrus, bilateral precentral gyrus, left middle frontal gyrus, left superior frontal gyrus, bilateral thalamus, bilateral caudate, right insula, left postcentral gyrus, bilateral lingual gyrus, bilateral parahippocampal gyrus, right superior temporal gyrus, left angular gyrus, left superior occipital gyrus, left precuneus, left middle temporal gyrus, left posterior cingulate cortex (PCC), and left cerebellum (Table 2,

**Table 2.** Talairach coordinates and Brodmann's areas for regions of statistically significant activation ( $p < 0.0005$  at voxel level uncorrected threshold) in response to virtual LBP stimulation (task – control condition).

| Anatomical region                      | Side | Coordinate    | Broadmann area | Z score |
|----------------------------------------|------|---------------|----------------|---------|
| LBP group as compared to non-LBP group |      |               |                |         |
| Fusiform gyrus                         | Lt   | –46, –34, –13 | Area 20        | 4.53    |
| Inferior temporal gyrus                | Lt   | –57, –43, –15 | Area 37        | 3.60    |
| Precentral gyrus                       | Lt   | –32, 8, 38    | Area 9         | 4.38    |
|                                        | Rt   | 28, –24, 56   | Area 4         | 4.03    |
| Middle frontal gyrus                   | Lt   | –46, 20, 43   | Area 8         | 3.68    |
|                                        |      | –32, 11, 60   | Area 6         | 3.50    |
| Superior frontal gyrus                 | Lt   | –40, 16, 53   | Area 8         | 3.56    |
| Thalamus                               | Lt   | –24, –25, 7   | -              | 4.34    |
|                                        | Rt   | 24, –27, 0    | -              | 3.40    |
| Caudate                                | Lt   | –28, –32, 13  | -              | 3.57    |
|                                        | Rt   | 38, –35, –3   | -              | 3.91    |
| Insula                                 | Rt   | 28, –27, 12   | Area 13        | 4.30    |
|                                        | Rt   | 34, –20, 18   | Area 13        | 3.50    |
| Postcentral gyrus                      | Lt   | –8, –55, 64   | Area 7         | 4.07    |
| Lingual gyrus                          | Rt   | 18, –62, 0    | Area 19        | 3.99    |
|                                        | Lt   | –6, –72, –5   | Area 18        | 3.81    |
| Parahippocampal gyrus                  | Lt   | –36, –43, 0   | Area 19        | 3.96    |
|                                        | Rt   | 32, –53, –4   | Area 19        | 3.91    |
|                                        | Rt   | 28, –41, –10  | Area 36        | 3.62    |
| Superior temporal gyrus                | Rt   | 40, –35, 4    | Area 41        | 3.78    |
| Angular gyrus                          | Lt   | –32, –74, 30  | Area 39        | 3.88    |
| Superior occipital gyrus               | Lt   | –38, –80, 33  | Area 19        | 3.78    |
| Precuneus                              | Lt   | –42, –72, 35  | Area 19        | 3.42    |
| Middle temporal gyrus                  | Lt   | –60, –35, –5  | Area 21        | 3.62    |
| Posterior cingulate gyrus              | Lt   | –10, –41, 30  | Area 31        | 3.61    |
|                                        | Lt   | –4, –43, 37   | Area 31        | 3.55    |
| Cerebellum                             | Lt   | –24, –30, –20 | -              | 3.88    |
| non-LBP group as compared to LBP group |      |               |                |         |
| Caudate                                | Rt   | 22, –34, 20   | -              | 3.61    |

doi:10.1371/journal.pone.0026681.t002

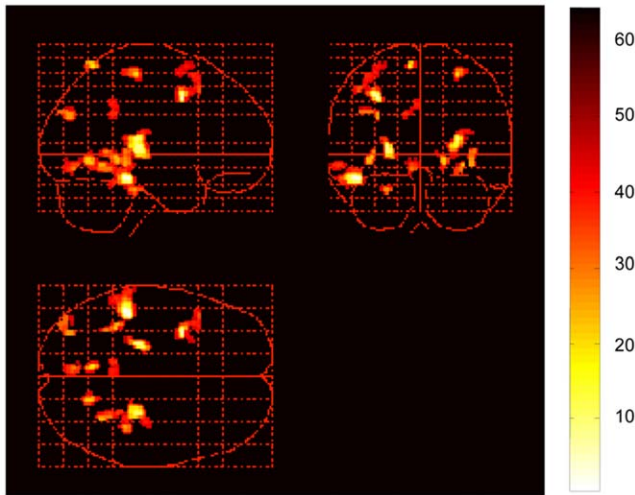

**Figure 1. Areas of cortical activation in the LBP group compared with the non-LBP group in response to virtual LBP stimuli (task – control condition) detected by fMRI( $p < 0.0005$ , Z score  $> 3.4$ , uncorrected threshold).**  
doi:10.1371/journal.pone.0026681.g001

Fig. 1). The reverse contrast showed that the LBP group had lower activations than the non-LBP group in a single cluster in right caudate (Table 2).

In the LBP group, activations related to discomfort were found in the bilateral thalamus, bilateral medial frontal gyrus, right claustrum, left cerebellum (Table 3, Fig. 2). Activations associated with self-reported pain were found in the right thalamus and right lingual gyrus. RDQ scores were associated with activation in the left ACC, and ODI scores were associated with activations in the right insula (Table 3, Fig. 3).

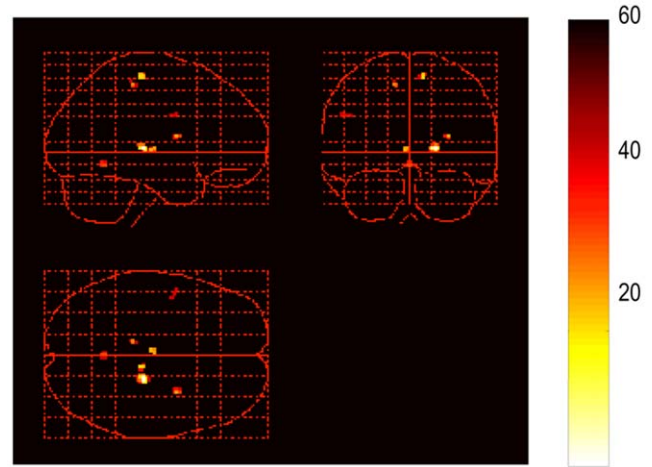

**Figure 2. Areas of cortical activation showing an association with perceived discomfort.**  
doi:10.1371/journal.pone.0026681.g002

**Discussion**

Our results demonstrate that viewing images of simulated back pain evoke unpleasant feelings, and specific brain activations in individuals with LBP. According to the International Association for the Study of Pain, pain is defined as, “an unpleasant sensory and emotional experience associated with actual or potential tissue damage, or described in terms of such damage”. As this definition suggests, both real pain stimuli and virtual pain experiences such as the visual stimuli in our study may play an important role in pain recognition and interpretation in the brain.

Functional MRI results showed that many of the areas described as being part of the “pain matrix” are also active during virtual pain. These results suggest that previous experiences of low back pain can sensitize an individual to pain anticipation. Activation in the insular cortex is associated with pain discrimination [17,18,19]. Additionally, the posterior insular cortex also plays a role in directing appropriate motor behaviors [20]. Furthermore, the insular cortex has projections to the SMA [21,22]. The SMA and PMA are commonly activated by pain [19,23], and usually associated with motor preparation. Activation in those areas might be associated with preparation for protective behavior against pain. In addition, we found virtual LBP stimuli led to increased activation in cerebellum. Activity in the cerebellum is frequently found in pain neuroimaging studies. Cerebellar activation is considered to be primarily associated with motor responses [13]. The need for temporally precise information may also be relevant for brain areas involved in initiating, propagating, and executing defensive motor responses to noxious stimuli [11,13,24,25].

The thalamus and the pulvinar are heavily interconnected with the visual and parietal cortices. Neuroimaging studies suggest responses in the pulvinar have a spatiotopic organization that are modulated by visual attention [26,27,28]. These results suggest that low back pain experiences may make individuals pay more attention to pain-related visual stimuli.

Many reports identify a role of the PCC in negative emotion [29,30,31,32,33,34], visuospatial orientation, and assessment of self-relevant sensation [35]. Exaggerated cerebral activation by pain stimuli may also be associated with pathologic pain states such as allodynia [36,37]. Together with its possible role in inflammatory pain [38], PCC activation could possibly reflect the negative emotion and the pathologic state of pain.

**Table 3. Cortical areas showing a linear signal increase with the discomfort rating, pain rating, RDQ scores and ODI scores.**

| Anatomical region        | Side | Coordinate   | Broadmann area | Z score |
|--------------------------|------|--------------|----------------|---------|
| <b>Discomfort</b>        |      |              |                |         |
| Thalamus                 | Rt   | 20, -23, 5   | -              | 4.19    |
|                          | Lt   | -4, -17, 3   | -              | 3.78    |
| Medial frontal gyrus     | Rt   | 10, -22, 58  | Area 6         | 3.85    |
|                          | Lt   | -12, -28, 53 | Area 6         | 3.70    |
|                          | Lt   | -50, 1, 28   | Area 6         | 3.38    |
| Clastrum                 | Rt   | 30, 3, 13    | -              | 3.75    |
| Cerebellum               | Lt   | 0, -53, -6   | -              | 3.57    |
| <b>Pain</b>              |      |              |                |         |
| Thalamus                 | Rt   | 20, -31, 7   | -              | 4.27    |
| Lingual gyrus            | Rt   | 8, -86, -11  | Area 18        | 3.62    |
| <b>RDQ</b>               |      |              |                |         |
| Anterior cingulate gyrus | Lt   | -6, 9, 27    | Area 24        | 3.99    |
| <b>ODI</b>               |      |              |                |         |
| Insula                   | Rt   | 40, -8, -5   | Area 13        | 3.67    |

RDQ, Roland-Morris Disability Questionnaire; ODI, Oswestry Disability Index 2.0.  
doi:10.1371/journal.pone.0026681.t003

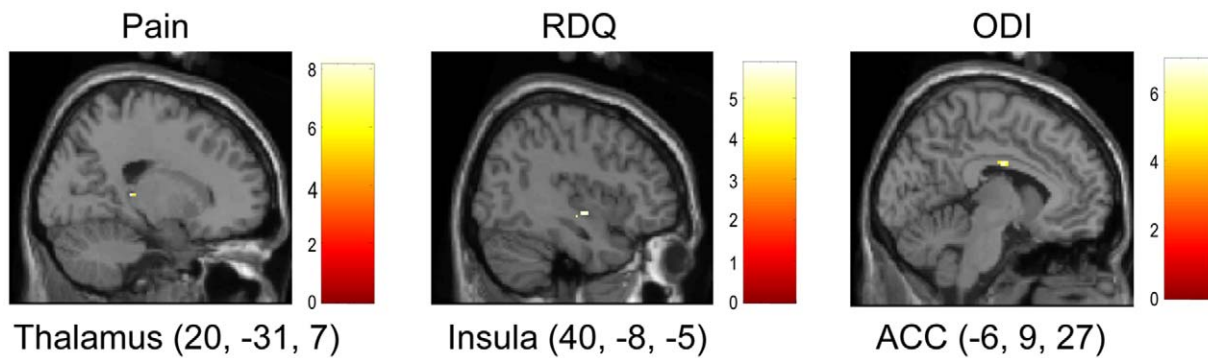

**Figure 3. Sagittal sections showing cortical clusters where activity was linearly correlated with perceived pain, RDQ scores and ODI scores.**

doi:10.1371/journal.pone.0026681.g003

We found other regions with heightened activity in LBP participants, in areas outside of the classic pain matrix. Those regions included the hippocampus, fusiform gyrus and angular gyrus. While not typically considered a nociceptive processing region, activation in the hippocampus has been previously reported to be activated in response to painful heat [14,39] and laser stimulation [40]. The hippocampus has been traditionally associated with recent memory consolidation [41], spatial memory [42], and fear-initiated avoidance behavior [43]. The hippocampus might also play a role in memorizing the pain stimulation and preparing fear-initiated avoidance. The fusiform gyrus is often associated with facial recognition [44]. It is conceivable, therefore, that our visual stimuli (which included a human face) may have been responsible for observed activations in the fusiform gyrus. However, our visual stimuli included a human face without any facial expression. This might suggest that the fusiform gyrus plays another important role in the cognitive neuroscience field. The angular gyrus is associated with empathy and ‘theory of mind’ [45]. Visual stimuli may cause subjects in the LBP group to imagine self pain or feel empathy towards the individual in pain in the picture.

Via parametric analyses in the LBP group, we identified several regional activations that were associated with discomfort rating, pain rating, RDQ scores and ODI scores. The SMA and PMA were related to the discomfort rating. As indicated previously, the SMA and PMA are involved in motor preparation. Activation in those areas might therefore be associated with preparation of protective behaviors against discomfort and pain. Thalamic activation was associated with both discomfort and pain ratings. Greater insula activation was associated with higher ODI scores. The thalamus and insula are considered part of the sensory component of pain processing [46]. But, a recent study suggests that imagining oneself in painful situations is sufficient to trigger some pain sensory regions [47]. The ACC was associated with RDQ scores. The ACC is an important part of affective pain processing [48,49] and can be activated in tasks of pain empathy [47,50,51,52,53,54,55]. It is unknown, therefore, whether the ACC activations, which were observed in the LBP group, were due to imagined self pain, or empathetic pain for the individual in the picture.

In this study, we showed that pain-related visual stimuli can activate several regions of the pain matrix in LBP patients, but not normal volunteers. Moreover, the pain questionnaire scores in the LBP patients were associated with greater activation of pain-processing brain regions. Functional MRI and the virtual

visual tasks are non-invasive methods for probing pain-related fear and catastrophizing. These results might be applied to the evaluation of chronic pain syndromes, such as low back pain, in the future.

## Materials and Methods

We recruited subjects with nonspecific LBP (LBP group) ( $n = 11$ , 6 male, 5 female, mean age 20.4 years) and subjects without LBP (non-LBP group) ( $n = 11$ , 5 male, 6 female, mean age 21.5 years). All participants were right-handed, had no history of cerebrovascular disease, and were free from any medication within 24 hours of the study. Scores for the Roland-Morris Disability Questionnaire (RDQ) and Oswestry Disability Index 2.0 (ODI) were obtained for all participants. Participants in the LBP group reported low back pain, and a RDQ or ODI score greater than zero. Participants in the non-LBP group had never experienced low back pain lasting longer than 1 week, and their RDQ and ODI scores were zero. No participants in either group displayed any evidence of structural abnormality in the lumbar spine on MRI, or any neurologic symptoms. None reported having a history of psychiatric disorders, or currently using any psychoactive medications.

We used virtual LBP stimuli depicting a man who is carrying luggage in a half-crouching position (Fig. 4). This picture represents an action that would likely cause pain in an individual with low back pain, and may therefore cause pain anticipation in the LBP group. Participants were also shown a picture depicting a man standing in front of luggage, providing the baseline stimulation (control condition) (Fig. 4). Participants in the LBP group had painful experiences in the half-crouching posture but did not have any pain in the standing posture. In addition, the participants in the LBP group currently feel little pain in daily life. During the fMRI session, trials were presented in a fixed block design. The distance between the participants’ eyes and the screen was 12.5 cm, with a visual angle of  $7.4 \times 11.3^\circ$ . The trials were applied eight times in each series, with each trial presentation lasting 3 seconds. The entire functional experiment lasted 150 seconds (see details of the experimental paradigm in Fig. 4). Self-reported discomfort and pain measures were collected using a numerical rating scale after the experimental session.

Images of the entire brain were acquired using GE SIGNA 3.0 Tesla scanner. Blood oxygenation level-dependent (BOLD) signals were collected with a T2-weighted, multi-slice, gradient echo-planar imaging (EPI) sequence (TE = 35 ms, TR = 3000 ms, flip angle =  $90^\circ$ , slice width = 4 mm, gap = 0 mm, 36 axial slices). Participants were scanned in the supine position, with the head

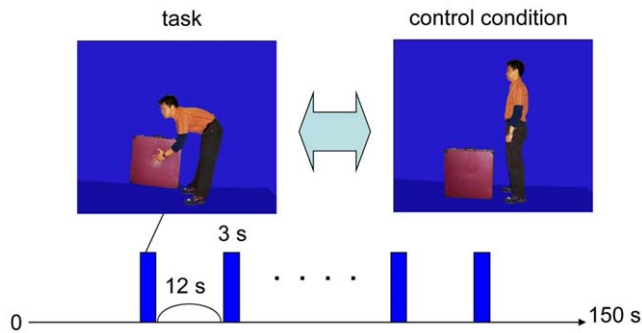

**Figure 4. Experimental design.** Subjects enrolled in the experiment were shown a picture demonstrating a man holding luggage in a half-crouching position (task picture) and a picture demonstrating a man standing in front of luggage, providing the baseline stimulation (control condition picture).

doi:10.1371/journal.pone.0026681.g004

fixed to minimize movement artifact. During the experiment, participants were simply instructed to observe the picture on screen.

The study was approved by the Ethical Committee of Kochi Medical School. All participants were informed of the study purpose beforehand and provided written consent to participate.

Results were analyzed on a Unix workstation using SPM2 (Statistical Parametric Mapping) software; Wellcome Department of Cognitive Neurology, Institute of Neurology, London: <http://www.fil.ion.ucl.ac.uk/spm>). The acquired images were realigned, spatially normalized to a standard EPI template and finally

## References

- Sullivan MJ, Rodgers WM, Kirsch I (2001) Catastrophizing, depression and expectancies for pain and emotional distress. *Pain* 91: 147–154.
- Sullivan MJ, Lynch ME, Clark AJ (2005) Dimensions of catastrophic thinking associated with pain experience and disability in patients with neuropathic pain conditions. *Pain* 113: 310–315.
- Van Damme S, Crombez G, Eccleston C (2004) Disengagement from pain: the role of catastrophic thinking about pain. *Pain* 107: 70–76.
- Apkarian AV, Darbar A, Krauss BR, Gelnar PA, Szeverenyi NM (1999) Differentiating cortical areas related to pain perception from stimulus identification: temporal analysis of fMRI activity. *J Neurophysiol* 81: 2956–2963.
- Qiu Y, Noguchi Y, Honda M, Nakata H, Tamura Y, et al. (2006) Brain processing of the signals ascending through unmyelinated C fibers in humans: an event-related functional magnetic resonance imaging study. *Cereb Cortex* 16: 1289–1295.
- Wager TD, Rilling JK, Smith EE, Sokolik A, Casey KL, et al. (2004) Placebo-induced changes in fMRI in the anticipation and experience of pain. *Science* 303: 1162–1167.
- Koyama T, McHaffie JG, Laurienti PJ, Coghill RC (2005) The subjective experience of pain: where expectations become reality. *Proc Natl Acad Sci U S A* 102: 12950–12955.
- Ogino Y, Nemoto H, Inui K, Saito S, Kakigi R, et al. (2007) Inner experience of pain: imagination of pain while viewing images showing painful events forms subjective pain representation in human brain. *Cereb Cortex* 17: 1139–1146.
- Ushida T, Ikemoto T, Tanaka S, Shinozaki J, Taniguchi S, et al. (2008) Virtual needle pain stimuli activates cortical representation of emotions in normal volunteers. *Neurosci Lett* 439: 7–12.
- Ushida T, Ikemoto T, Taniguchi S, Ishida K, Murata Y, et al. (2005) Virtual pain stimulation of allodynia patients activates cortical representation of pain and emotions: a functional MRI study. *Brain Topogr* 18: 27–35.
- Gracely RH, Geisser ME, Giesecke T, Grant MA, Petzke F, et al. (2004) Pain catastrophizing and neural responses to pain among persons with fibromyalgia. *Brain* 127: 835–843.
- Bornhoved K, Quante M, Glauche V, Bromm B, Weiller C, et al. (2002) Painful stimuli evoke different stimulus-response functions in the amygdala, prefrontal, insula and somatosensory cortex: a single-trial fMRI study. *Brain* 125: 1326–1336.
- Buchel C, Bornhoved K, Quante M, Glauche V, Bromm B, et al. (2002) Dissociable neural responses related to pain intensity, stimulus intensity, and stimulus awareness within the anterior cingulate cortex: a parametric single-trial laser functional magnetic resonance imaging study. *J Neurosci* 22: 970–976.
- Derbyshire SW, Jones AK, Gyulai F, Clark S, Townsend D, et al. (1997) Pain processing during three levels of noxious stimulation produces differential patterns of central activity. *Pain* 73: 431–445.
- Valet M, Sprenger T, Boecker H, Willloch F, Rummeny E, et al. (2004) Distraction modulates connectivity of the cingulo-frontal cortex and the midbrain during pain—an fMRI analysis. *Pain* 109: 399–408.
- Kobayashi Y, Kurata J, Sekiguchi M, Kokubun M, Akaishizawa T, et al. (2009) Augmented cerebral activation by lumbar mechanical stimulus in chronic low back pain patients: an FMRI study. *Spine (Phila Pa 1976)* 34: 2431–2436.
- Henderson LA, Gandevia SC, Macefield VG (2007) Somatotopic organization of the processing of muscle and cutaneous pain in the left and right insula cortex: a single-trial fMRI study. *Pain* 128: 20–30.
- Korotkov A, Ljubisavljevic M, Thunberg J, Kataeva G, Roudas M, et al. (2002) Changes in human regional cerebral blood flow following hypertonic saline induced experimental muscle pain: a positron emission tomography study. *Neurosci Lett* 335: 119–123.
- Svensson P, Minoshima S, Beydoun A, Morrow TJ, Casey KL (1997) Cerebral processing of acute skin and muscle pain in humans. *J Neurophysiol* 78: 450–460.
- Berthier M, Starkstein S, Leiguarda R (1988) Asymbolia for pain: a sensory-limbic disconnection syndrome. *Ann Neurol* 24: 41–49.
- Augustine JR (1996) Circuitry and functional aspects of the insular lobe in primates including humans. *Brain Res Brain Res Rev* 22: 229–244.
- Luppino G, Matelli M, Camarda R, Rizzolatti G (1993) Corticocortical connections of area F3 (SMA-proper) and area F6 (pre-SMA) in the macaque monkey. *J Comp Neurol* 338: 114–140.
- Hsieh JC, Stahle-Backdahl M, Hagermark O, Stone-Elander S, Rosenquist G, et al. (1996) Traumatic nociceptive pain activates the hypothalamus and the periaqueductal gray: a positron emission tomography study. *Pain* 64: 303–314.
- Peyron R, Kupers R, Jehl JL, Garcia-Larrea L, Convers P, et al. (2007) Central representation of the RIII flexion reflex associated with overt motor reaction: an fMRI study. *Neurophysiol Clin* 37: 249–259.
- Sullivan MJ, Thorn B, Haythornthwaite JA, Keefe F, Martin M, et al. (2001) Theoretical perspectives on the relation between catastrophizing and pain. *Clin J Pain* 17: 52–64.
- Cotton PL, Smith AT (2007) Contralateral visual hemifield representations in the human pulvinar nucleus. *J Neurophysiol* 98: 1600–1609.

27. Fischer J, Whitney D (2009) Precise discrimination of object position in the human pulvinar. *Hum Brain Mapp* 30: 101–111.
28. Smith AT, Cotton PL, Bruno A, Moutsiana C (2009) Dissociating vision and visual attention in the human pulvinar. *J Neurophysiol* 101: 917–925.
29. Benuzzi F, Lui F, Duzzi D, Nichelli PF, Porro CA (2008) Does it look painful or disgusting? Ask your parietal and cingulate cortex. *J Neurosci* 28: 923–931.
30. Britton JC, Phan KL, Taylor SF, Welsh RC, Berridge KC, et al. (2006) Neural correlates of social and nonsocial emotions: An fMRI study. *Neuroimage* 31: 397–409.
31. Maddock RJ, Garrett AS, Buonocore MH (2003) Posterior cingulate cortex activation by emotional words: fMRI evidence from a valence decision task. *Hum Brain Mapp* 18: 30–41.
32. Mantani T, Okamoto Y, Shirao N, Okada G, Yamawaki S (2005) Reduced activation of posterior cingulate cortex during imagery in subjects with high degrees of alexithymia: a functional magnetic resonance imaging study. *Biol Psychiatry* 57: 982–990.
33. Sander K, Frome Y, Scheich H (2007) FMRI activations of amygdala, cingulate cortex, and auditory cortex by infant laughing and crying. *Hum Brain Mapp* 28: 1007–1022.
34. Sinha R, Lacadie C, Skudlarski P, Wexler BE (2004) Neural circuits underlying emotional distress in humans. *Ann N Y Acad Sci* 1032: 254–257.
35. Vogt BA (2005) Pain and emotion interactions in subregions of the cingulate gyrus. *Nat Rev Neurosci* 6: 533–544.
36. Freund W, Wunderlich AP, Stuber G, Mayer F, Steffen P, et al. (2010) Different activation of opercular and posterior cingulate cortex (PCC) in patients with complex regional pain syndrome (CRPS I) compared with healthy controls during perception of electrically induced pain: a functional MRI study. *Clin J Pain* 26: 339–347.
37. Lorenz J, Cross DJ, Minoshima S, Morrow TJ, Paulson PE, et al. (2002) A unique representation of heat allodynia in the human brain. *Neuron* 35: 383–393.
38. Ruchle BS, Handwerker HO, Lennerz JK, Ringler R, Forster C (2006) Brain activation during input from mechanosensitive versus polymodal C-nociceptors. *J Neurosci* 26: 5492–5499.
39. Ploghaus A, Narain C, Beckmann CF, Clare S, Bantick S, et al. (2001) Exacerbation of pain by anxiety is associated with activity in a hippocampal network. *J Neurosci* 21: 9896–9903.
40. Bingel U, Quante M, Knab R, Bromm B, Weiller C, et al. (2002) Subcortical structures involved in pain processing: evidence from single-trial fMRI. *Pain* 99: 313–321.
41. Alvarez P, Squire LR (1994) Memory consolidation and the medial temporal lobe: a simple network model. *Proc Natl Acad Sci U S A* 91: 7041–7045.
42. Clark RE, Broadbent NJ, Squire LR (2007) The hippocampus and spatial memory: findings with a novel modification of the water maze. *J Neurosci* 27: 6647–6654.
43. Hollup SA, Kjelstrup KG, Hoff J, Moser MB, Moser EI (2001) Impaired recognition of the goal location during spatial navigation in rats with hippocampal lesions. *J Neurosci* 21: 4505–4513.
44. Radua J, Phillips ML, Russell T, Lawrence N, Marshall N, et al. (2010) Neural response to specific components of fearful faces in healthy and schizophrenic adults. *Neuroimage* 49: 939–946.
45. Vollm BA, Taylor AN, Richardson P, Corcoran R, Stirling J, et al. (2006) Neuronal correlates of theory of mind and empathy: a functional magnetic resonance imaging study in a nonverbal task. *Neuroimage* 29: 90–98.
46. Bushnell MC, Duncan GH, Holbauer RK, Ha B, Chen JI, et al. (1999) Pain perception: is there a role for primary somatosensory cortex? *Proc Natl Acad Sci U S A* 96: 7705–7709.
47. Jackson PL, Brunet E, Meltzoff AN, Decety J (2006) Empathy examined through the neural mechanisms involved in imagining how I feel versus how you feel pain. *Neuropsychologia* 44: 752–761.
48. Apkarian AV, Bushnell MC, Treede RD, Zubieta JK (2005) Human brain mechanisms of pain perception and regulation in health and disease. *Eur J Pain* 9: 463–484.
49. Davis KD, Taylor KS, Hutchison WD, Dostrovsky JO, McAndrews MP, et al. (2005) Human anterior cingulate cortex neurons encode cognitive and emotional demands. *J Neurosci* 25: 8402–8406.
50. Botvinick M, Jha AP, Bylsma LM, Fabian SA, Solomon PE, et al. (2005) Viewing facial expressions of pain engages cortical areas involved in the direct experience of pain. *Neuroimage* 25: 312–319.
51. Gu X, Han S (2007) Attention and reality constraints on the neural processes of empathy for pain. *Neuroimage* 36: 256–267.
52. Jackson PL, Meltzoff AN, Decety J (2005) How do we perceive the pain of others? A window into the neural processes involved in empathy. *Neuroimage* 24: 771–779.
53. Lamm C, Batson CD, Decety J (2007) The neural substrate of human empathy: effects of perspective-taking and cognitive appraisal. *J Cogn Neurosci* 19: 42–58.
54. Morrison I, Lloyd D, di Pellegrino G, Roberts N (2004) Vicarious responses to pain in anterior cingulate cortex: is empathy a multisensory issue? *Cogn Affect Behav Neurosci* 4: 270–278.
55. Singer T, Seymour B, O'Doherty J, Kaube H, Dolan RJ, et al. (2004) Empathy for pain involves the affective but not sensory components of pain. *Science* 303: 1157–1162.
56. Talairach J, Tournoux P (1988) *Co-planar Stereotaxic Atlas of the Human Brain*. New York: Thime Medical Publishers. 122 p.
